# Supplementary material for: Dietary Exposure and Health Risk Assessment of Polycyclic Aromatic Hydrocarbons in Black Tea Consumed in Taiwan
Source: MDPI journal article supplement (doi:10.3390/toxics12020134), 2024-02-07
Supplement: s1 [file s1]

# Supplementary Materials: Dietary exposure and health risk assessment of polycyclic aro-matic hydrocarbons in black tea consumed in Taiwan

Drewyan M. Harrison, Wei-Chung Chang and Hsin-Tang Lin

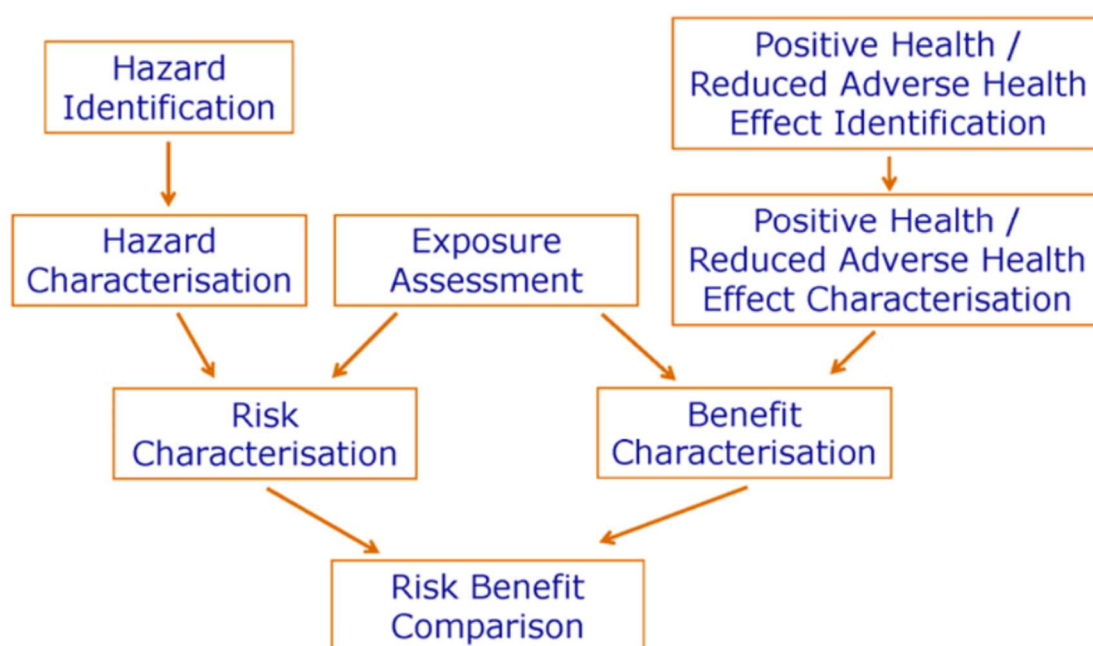

**Figure S1.** Risk-benefit assessment framework diagram discussed in the EFSA initial proposal [38].

**Table S1.** Concentration of PAH4 in black tea infusions from various countries.

| Country | Sample<br>number | Sample<br>(Group) | Concentration(µg/kg)  |      |     |      |      | Transfer (%) |       |      |      |       |
|---------|------------------|-------------------|-----------------------|------|-----|------|------|--------------|-------|------|------|-------|
|         |                  |                   | BaA                   | CHR  | BbF | BaP  | PAH4 | BaA          | CHR   | BbF  | BaP  | PAH4  |
| Taiwan  | 1                | (Loose Leaf)      | ND*                   | ND   | ND  | ND   | ND   | 0.00         | 0.00  | 0.00 | 0.00 | 0.00  |
|         | 2                | (Loose Leaf)      | ND                    | ND   | ND  | ND   | ND   | 0.00         | 0.00  | 0.00 | 0.00 | 0.00  |
|         | 3                | (Loose Leaf)      | ND                    | ND   | ND  | ND   | ND   | 0.00         | 0.00  | 0.00 | 0.00 | 0.00  |
|         | 4                | (Loose Leaf)      | ND                    | ND   | ND  | ND   | ND   | 0.00         | 0.00  | 0.00 | 0.00 | 0.00  |
|         | 5                | (Loose Leaf)      | ND                    | ND   | ND  | ND   | ND   | 0.00         | 0.00  | 0.00 | 0.00 | 0.00  |
|         | 6                | (Loose Leaf)      | 0.12                  | ND   | ND  | ND   | 0.12 | 47.13        | 0.00  | 0.00 | 0.00 | 20.12 |
|         | 7                | (Loose Leaf)      | ND                    | ND   | ND  | ND   | ND   | 0.00         | 0.00  | 0.00 | 0.00 | 0.00  |
|         | 8                | (Loose Leaf)      | ND                    | ND   | ND  | ND   | ND   | 0.00         | 0.00  | 0.00 | 0.00 | 0.00  |
|         | 9                | (Loose Leaf)      | ND                    | 0.24 | ND  | ND   | 0.29 | 0.00         | 29.82 | 0.00 | 0.00 | 25.81 |
|         | 10               | (Teabag)          | ND                    | ND   | ND  | ND   | ND   | 0.00         | 0.00  | 0.00 | 0.00 | 0.00  |
|         | 11               | (Bottle Drink)    | ND                    | ND   | ND  | ND   | ND   | -            | -     | -    | -    | -     |
|         | 12               | (Bottle Drink)    | ND                    | ND   | ND  | ND   | ND   | -            | -     | -    | -    | -     |
|         | 13               | (Bottle Drink)    | ND                    | ND   | ND  | ND   | ND   | -            | -     | -    | -    | -     |
|         | 14               | (Bottle Drink)    | ND                    | ND   | ND  | ND   | ND   | -            | -     | -    | -    | -     |
|         | 15               | (Tea Shop)        | ND                    | ND   | ND  | ND   | ND   | -            | -     | -    | -    | -     |
|         | 16               | (Tea Shop)        | ND                    | ND   | ND  | ND   | ND   | -            | -     | -    | -    | -     |
| Vietnam | 17               | (Loose Leaf)      | 0.13                  | ND   | ND  | ND   | 0.13 | 1.44         | 0.00  | 0.00 | 0.00 | 0.35  |
|         | 18               | (Loose Leaf)      | ND                    | ND   | ND  | 0.04 | 0.04 | 0.00         | 0.00  | 0.00 | 0.37 | 0.08  |
|         | 19               | (Tea Shop)        | ND                    | ND   | ND  | 0.03 | 0.03 | -            | -     | -    | -    | -     |
| Country | Sample<br>number | Sample<br>(Group) | Concentration (µg/kg) |      |     |      |      | Transfer (%) |       |      |      |       |
|         |                  |                   | BaA                   | CHR  | BbF | BaP  | PAH4 | BaA          | CHR   | BbF  | BaP  | PAH4  |
| India   | 20               | (Loose Leaf)      | ND                    | ND   | ND  | ND   | ND   | 0.00         | 0.00  | 0.00 | 0.00 | 0.00  |
|         | 21               | (Loose Leaf)      | ND                    | ND   | ND  | ND   | ND   | 0.00         | 0.00  | 0.00 | 0.00 | 0.00  |
|         | 22               | (Bottle Drink)    | ND                    | ND   | ND  | ND   | ND   | -            | -     | -    | -    | -     |
|         | 23               | (Bottle Drink)    | ND                    | ND   | ND  | ND   | ND   | -            | -     | -    | -    | -     |
|         | 24               | (Loose Leaf)      | 0.21                  | 0.24 | ND  | ND   | 0.45 | 5.55         | 3.01  | 0.00 | 0.00 | 3.58  |

|           |    |                |      |    |    |      |      |      |      |      |      |      |
|-----------|----|----------------|------|----|----|------|------|------|------|------|------|------|
|           | 25 | (Bottle Drink) | ND   | ND | ND | ND   | ND   | -    | -    | -    | -    | -    |
| Indonesia | 26 | (Loose Leaf)   | ND   | ND | ND | ND   | ND   | 0.00 | 0.00 | 0.00 | 0.00 | 0.00 |
|           | 27 | (Tea Shop)     | ND   | ND | ND | ND   | ND   | -    | -    | -    | -    | -    |
| Kenya     | 28 | (Loose Leaf)   | ND   | ND | ND | ND   | ND   | 0.00 | 0.00 | 0.00 | 0.00 | 0.00 |
|           | 29 | (Loose Leaf)   | ND   | ND | ND | ND   | ND   | 0.00 | 0.00 | 0.00 | 0.00 | 0.00 |
|           | 30 | (Loose Leaf)   | ND   | ND | ND | 0.05 | 0.05 | 0.00 | 0.00 | 0.00 | 2.29 | 0.29 |
| Sri Lanka | 31 | (Tea Shop)     | ND   | ND | ND | 0.03 | 0.03 | -    | -    | -    | -    | -    |
|           | 32 | (Bottle Drink) | 0.12 | ND | ND | 0.03 | 0.15 | -    | -    | -    | -    | -    |
|           | 33 | (Loose Leaf)   | ND   | ND | ND | ND   | ND   | 0.00 | 0.00 | 0.00 | 0.00 | 0.00 |
| Myanmar   | 34 | (Teabag)       | ND   | ND | ND | ND   | ND   | 0.00 | 0.00 | 0.00 | 0.00 | 0.00 |

\*ND = Not Detected, < LOD.

38. Assunção, R.; Pires, S.M.; Nauta, M. Risk-Benefit Assessment of Foods. *EFSA J.* **2019**, *17*, 170917. Available online: <https://efsa.onlinelibrary.wiley.com/doi/full/10.2903/j.efsa.2019.e170917> (accessed on 31 August 2021).
